# Supplementary material for: A hepatocyte-specific transcriptional program driven by Rela and Stat3 exacerbates experimental colitis in mice by modulating bile synthesis
Source: eLife journal article supplement (doi:10.7554/elife.93273), 2023-12-08

## STAT3-Ser727

### Labelling:

M - Protein ladder

C - wild type animals without any treatment

D2 - wildtype animals with DSS treatment for 2 days.

D4 - wildtype animals with DSS treatment for 4 days.

D6 - wildtype animals with DSS treatment for 6 days.

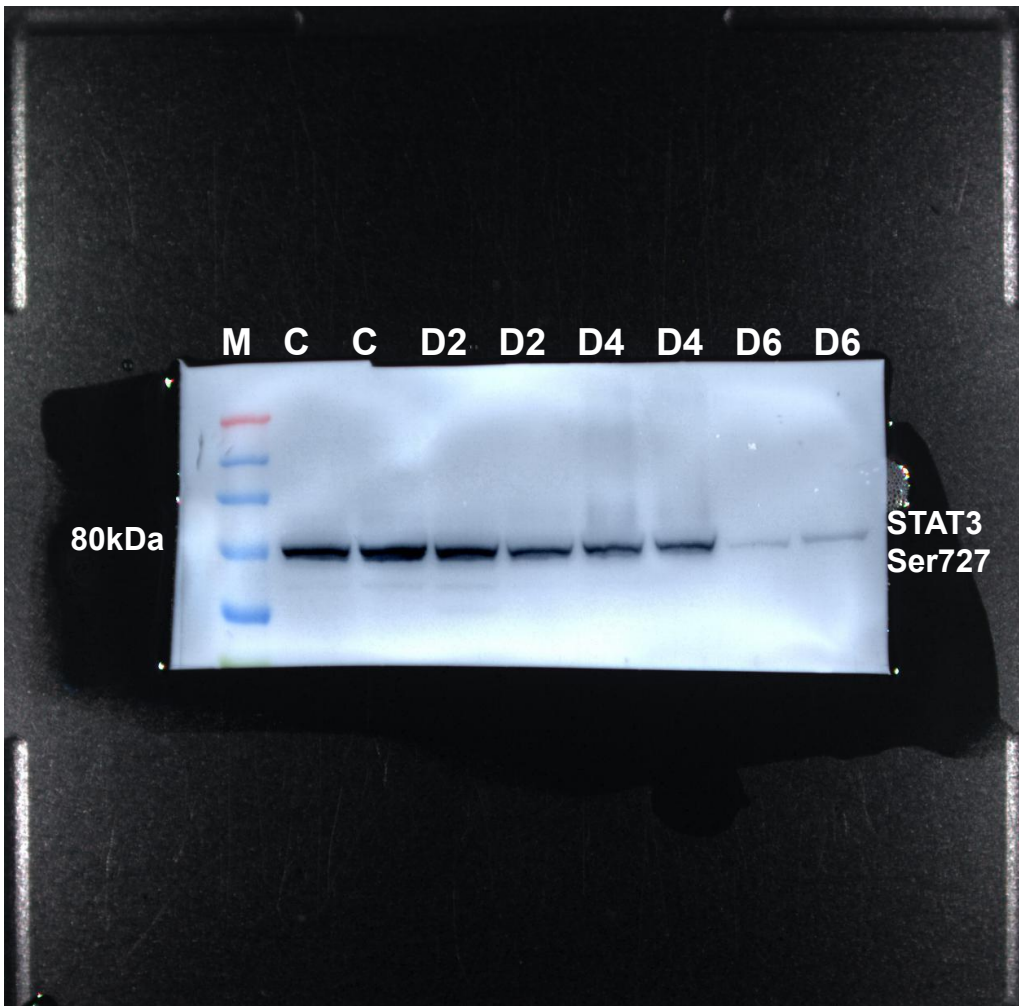

# STAT3-Tyr705

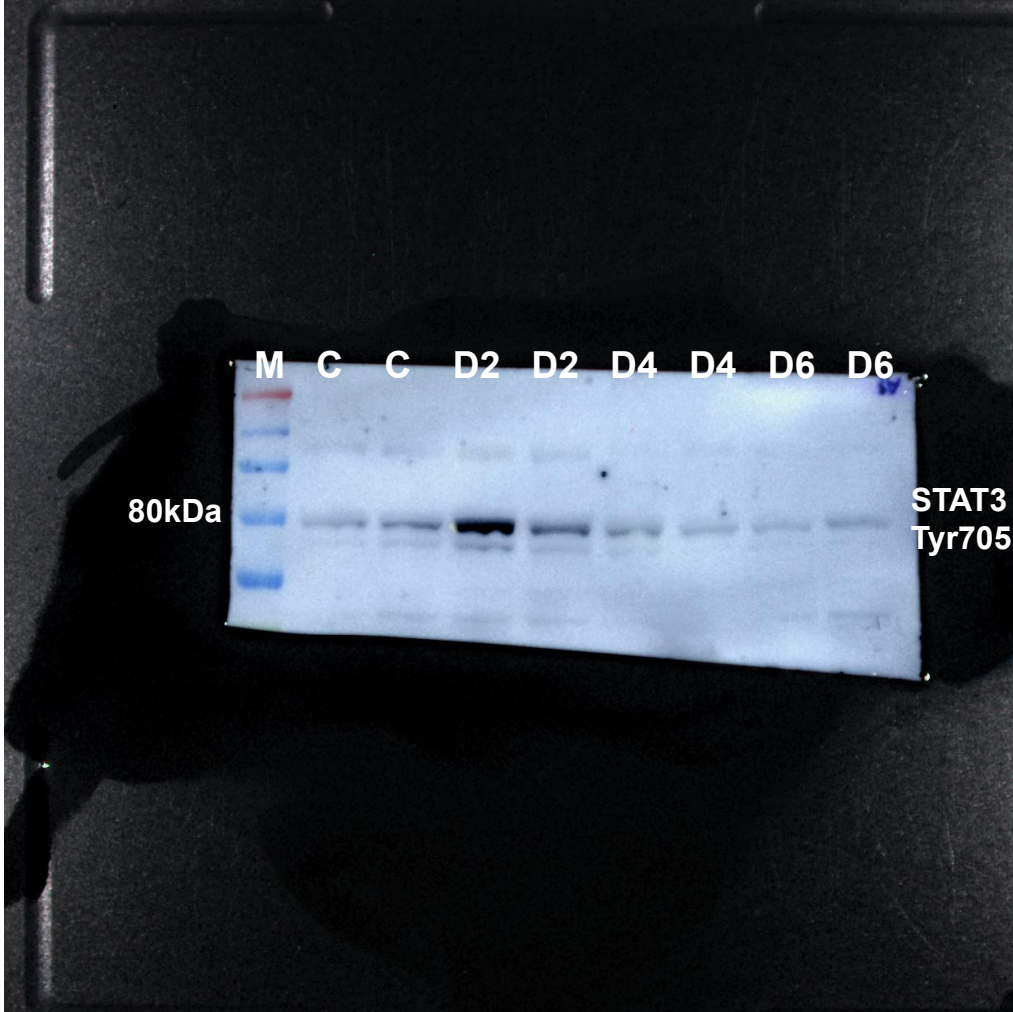

# Total STAT3

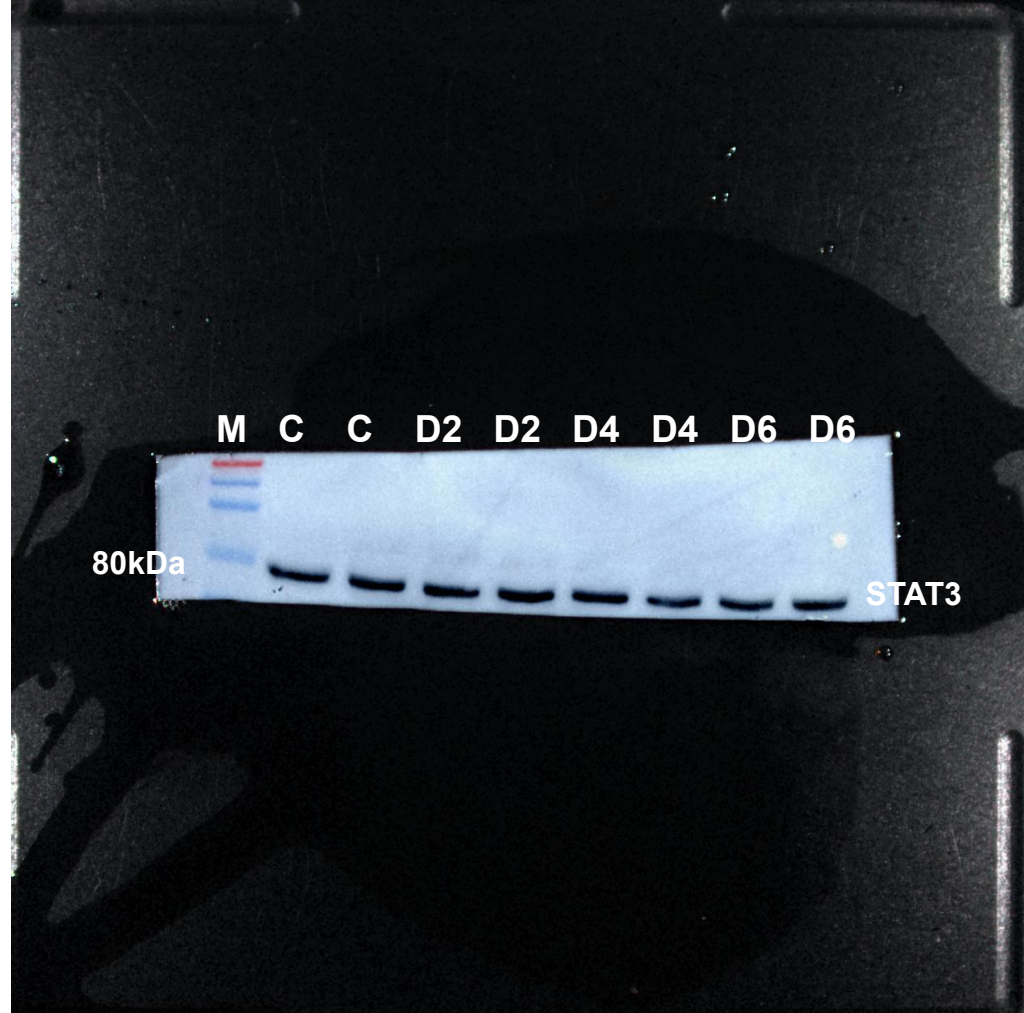

# RelA-Ser536

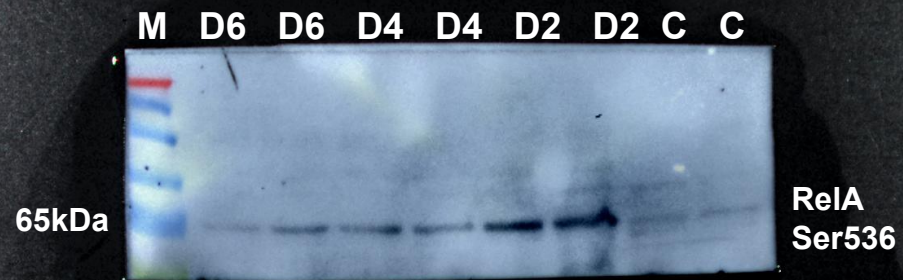



# Total RelA

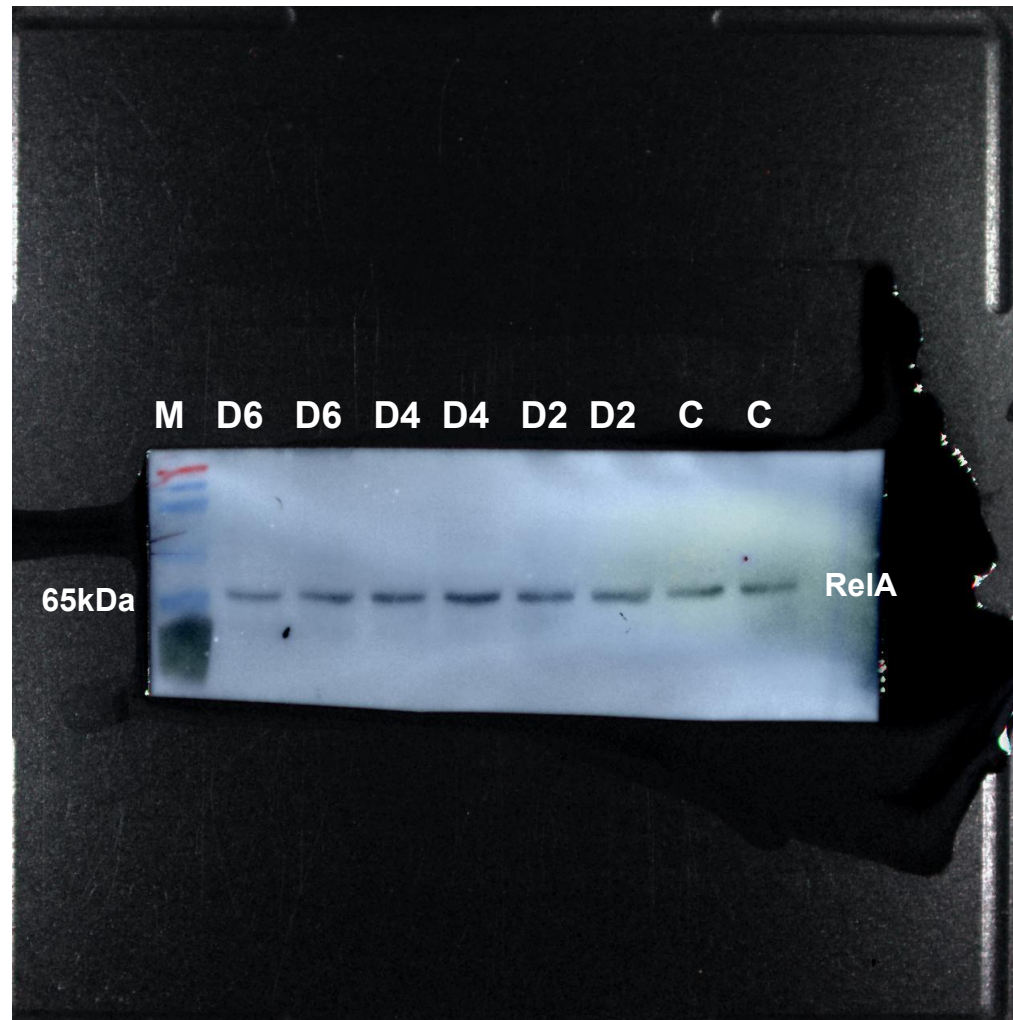

# Beta actin

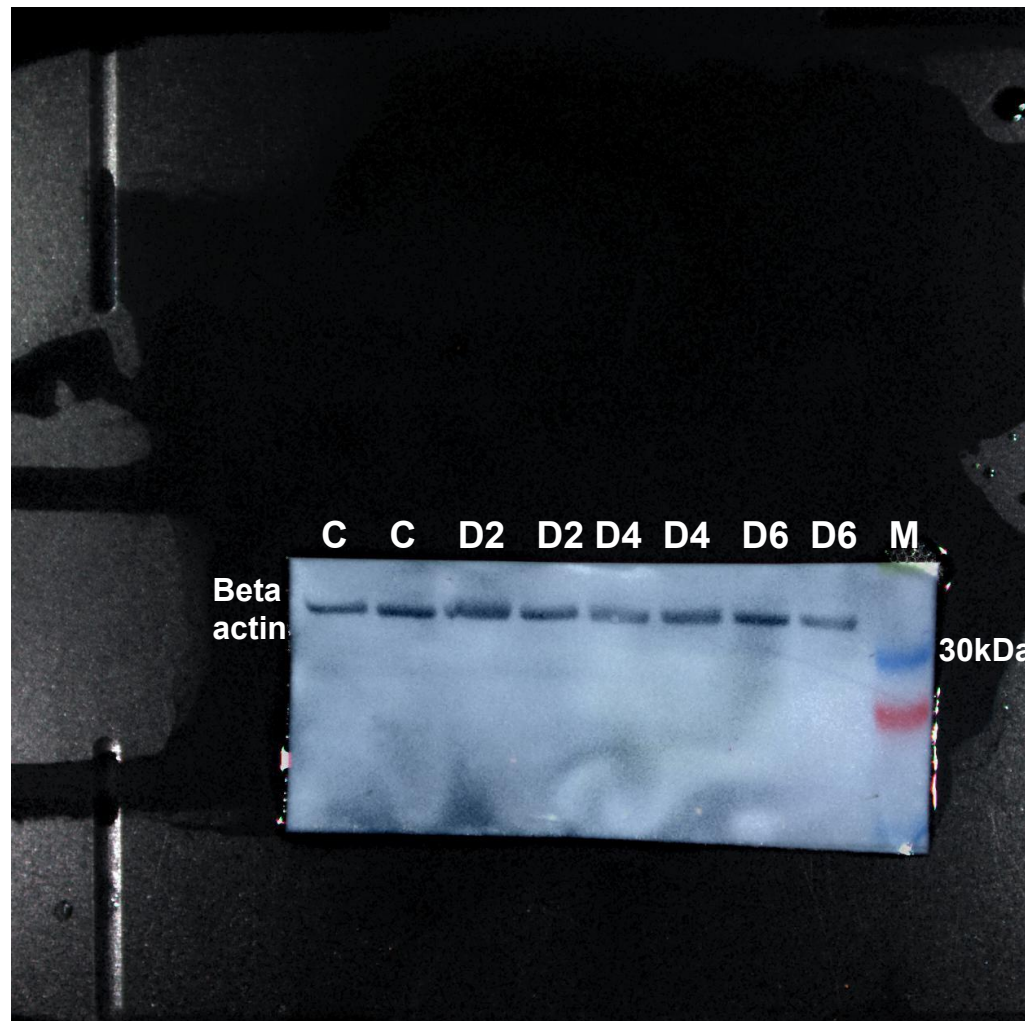

Supplement: fig1-data3 [file elife-93273-fig1-data3-v1.pdf]
