# Supplementary material for: A hepatocyte-specific transcriptional program driven by Rela and Stat3 exacerbates experimental colitis in mice by modulating bile synthesis
Source: eLife journal article supplement (doi:10.7554/elife.93273), 2023-12-08

**STAT3- Ser727**

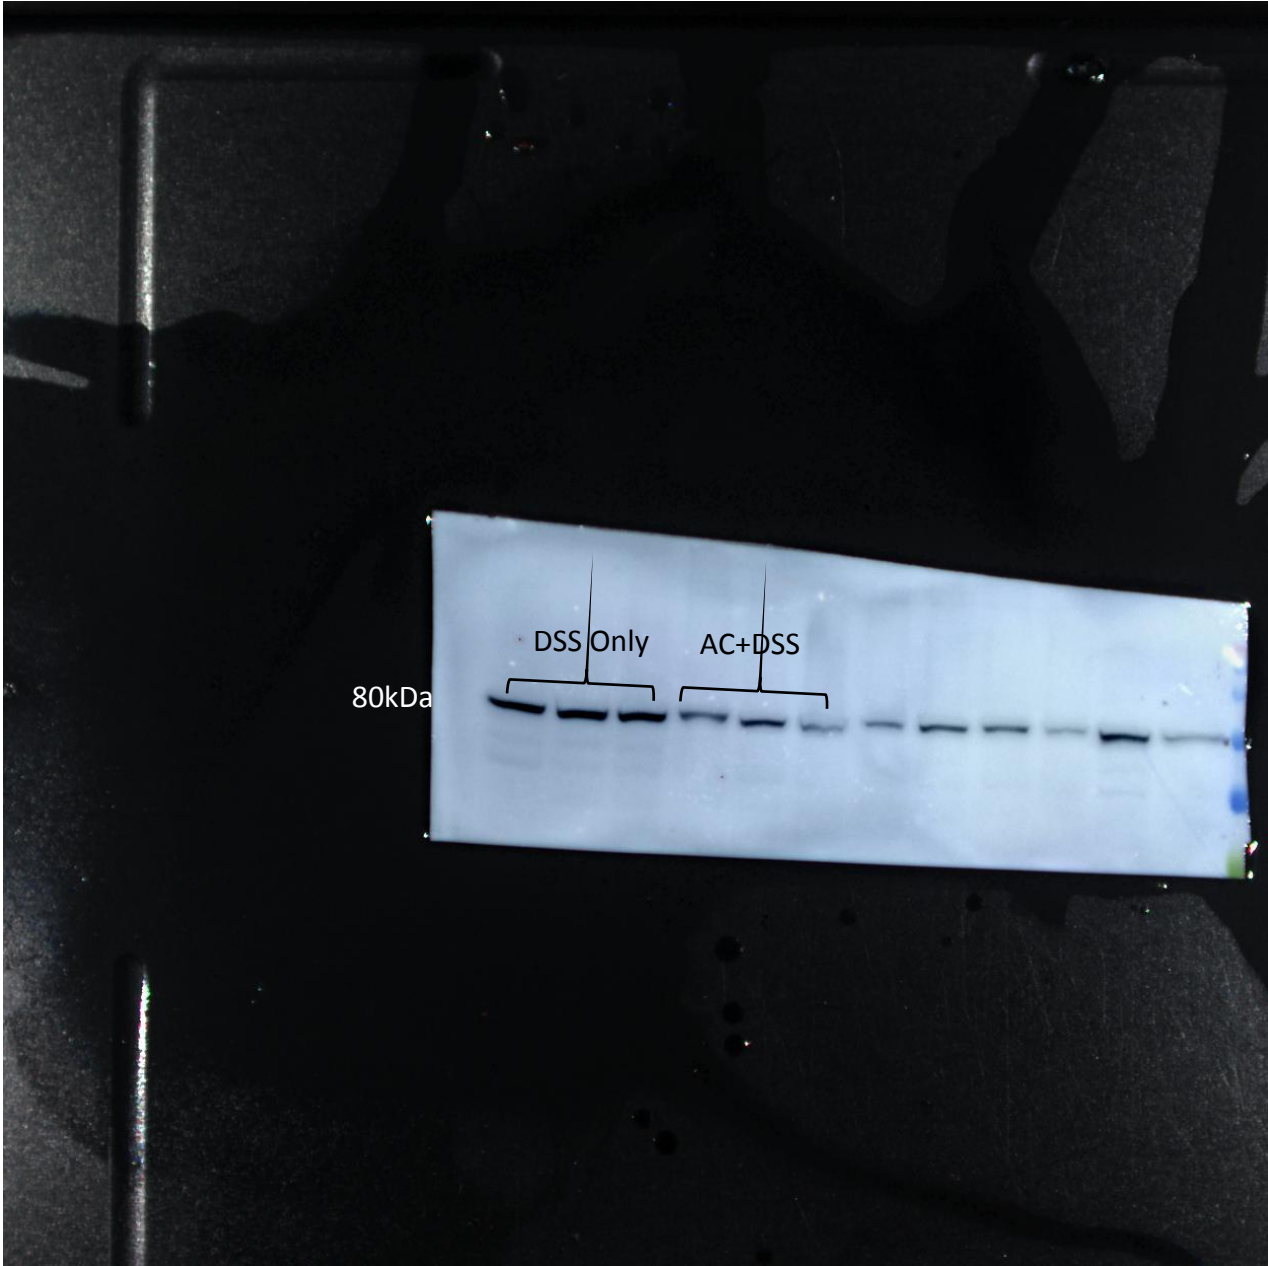

80kDa

DSS Only

AC+DSS

STAT3-  
Ser727

**Total STAT3**

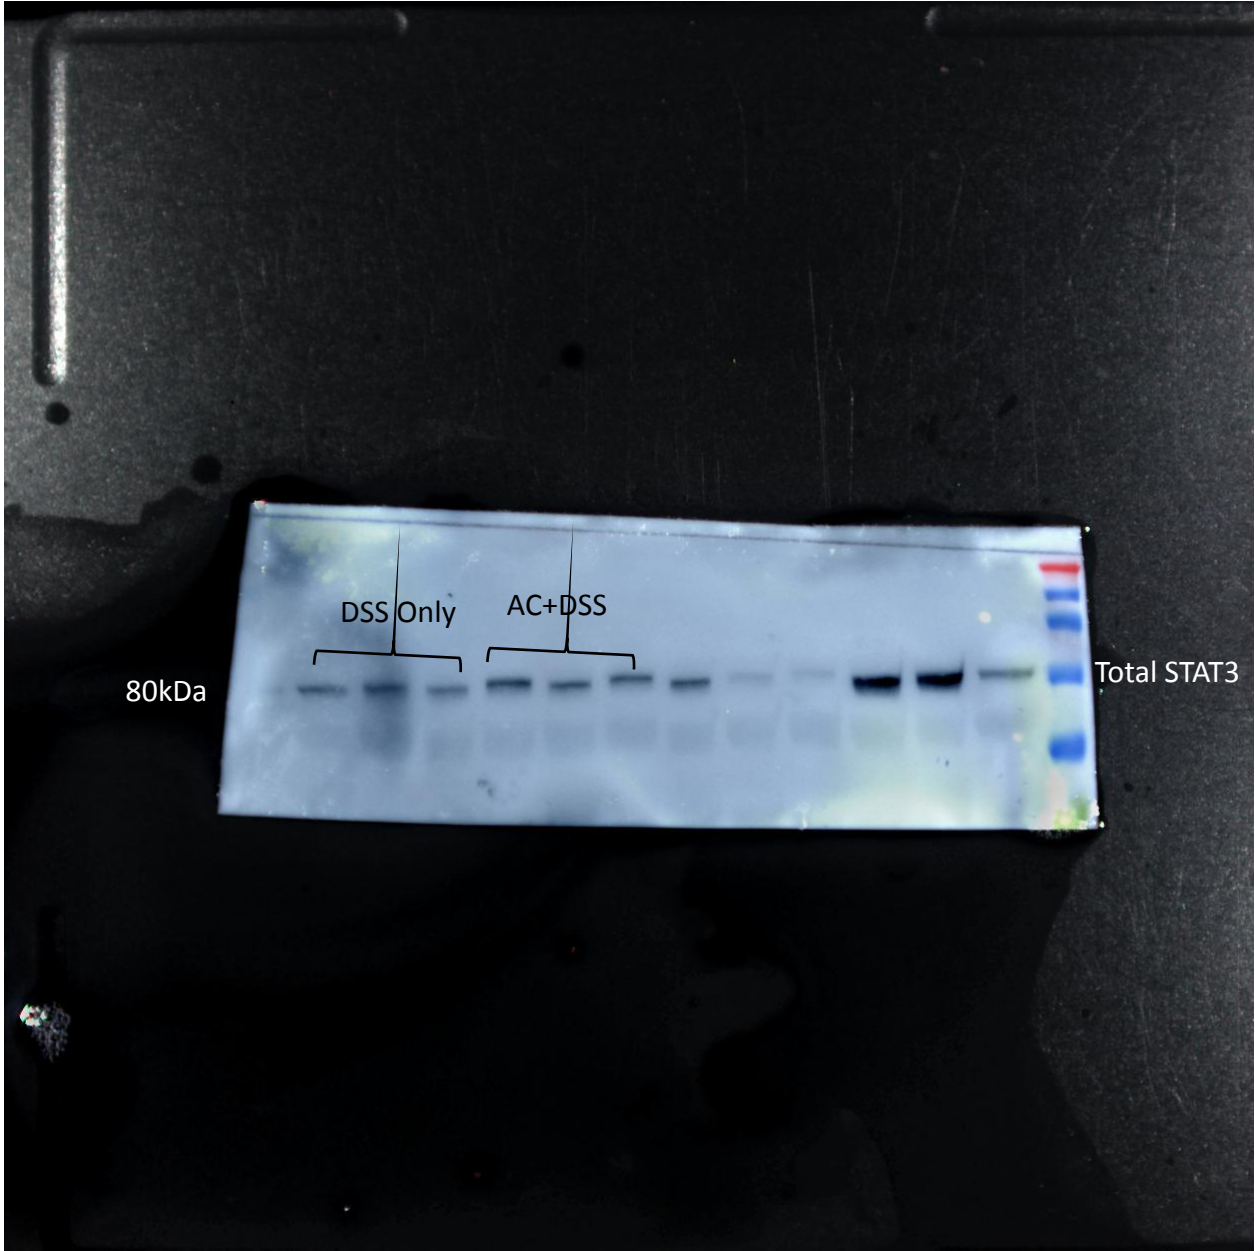

Beta actin

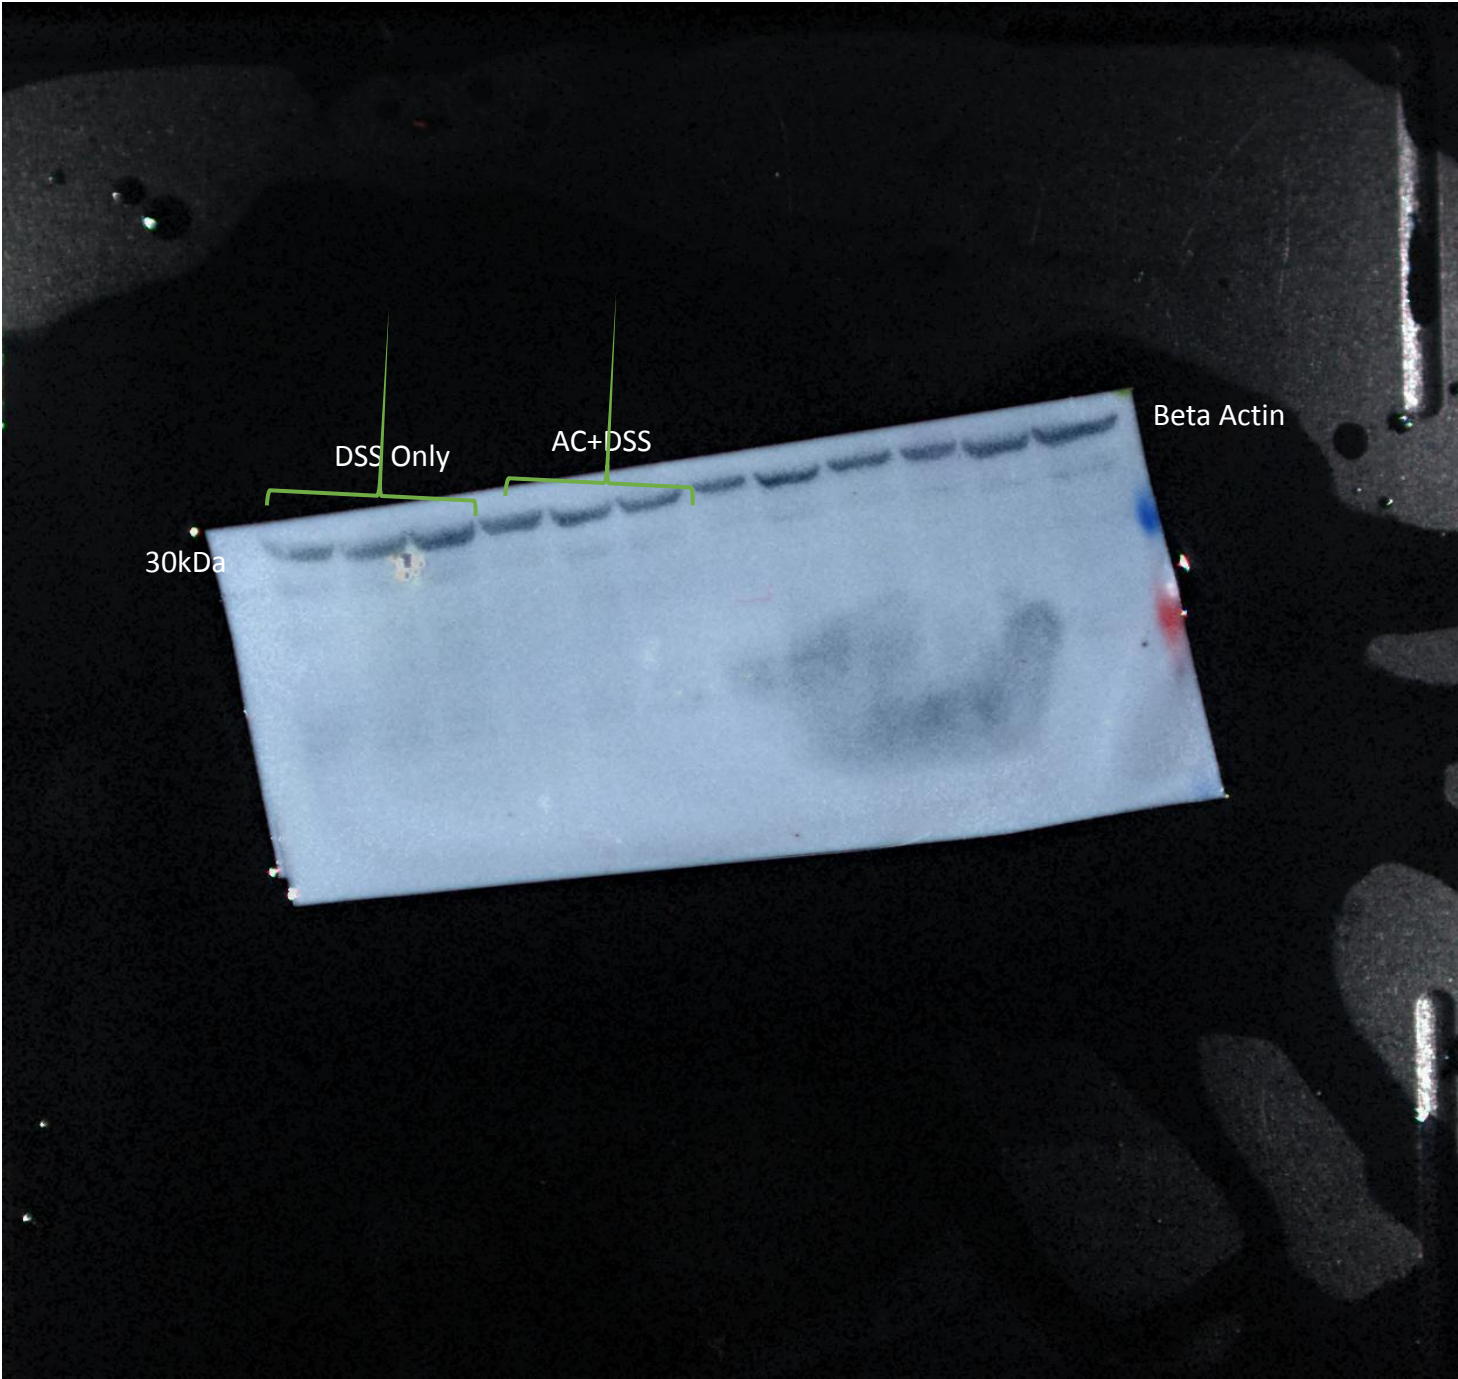

Supplement: fig1-figsupp1-data2 [file elife-93273-fig1-figsupp1-data2-v1.pdf]
