# Supplementary material for: A hepatocyte-specific transcriptional program driven by Rela and Stat3 exacerbates experimental colitis in mice by modulating bile synthesis
Source: eLife journal article supplement (doi:10.7554/elife.93273), 2023-12-08

## Gel run for PCR product of CRE and internal control

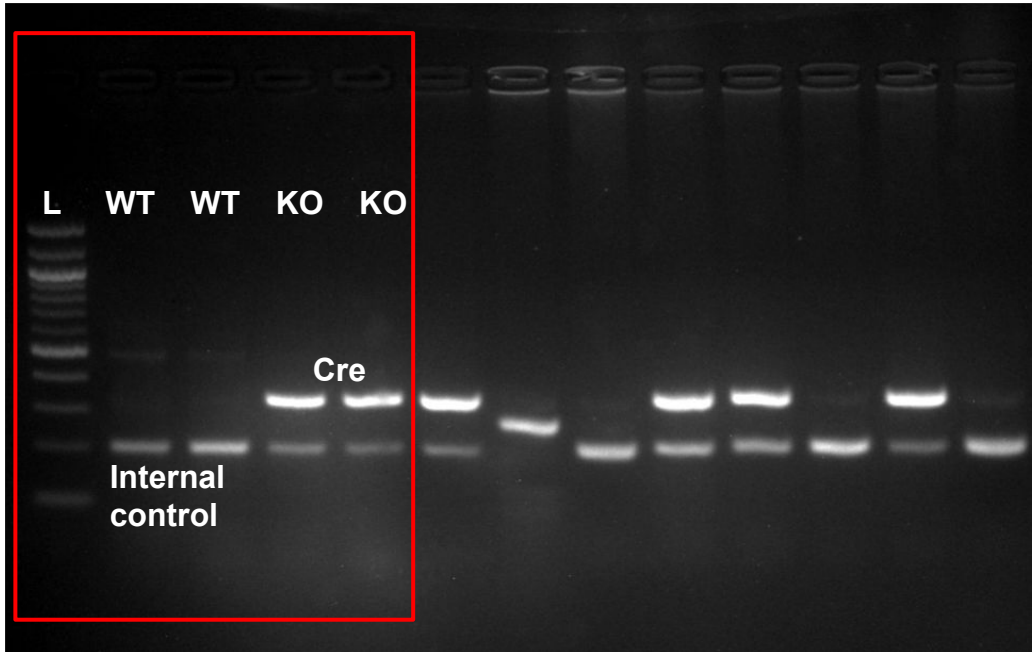

# Gel run for PCR product of fRelA

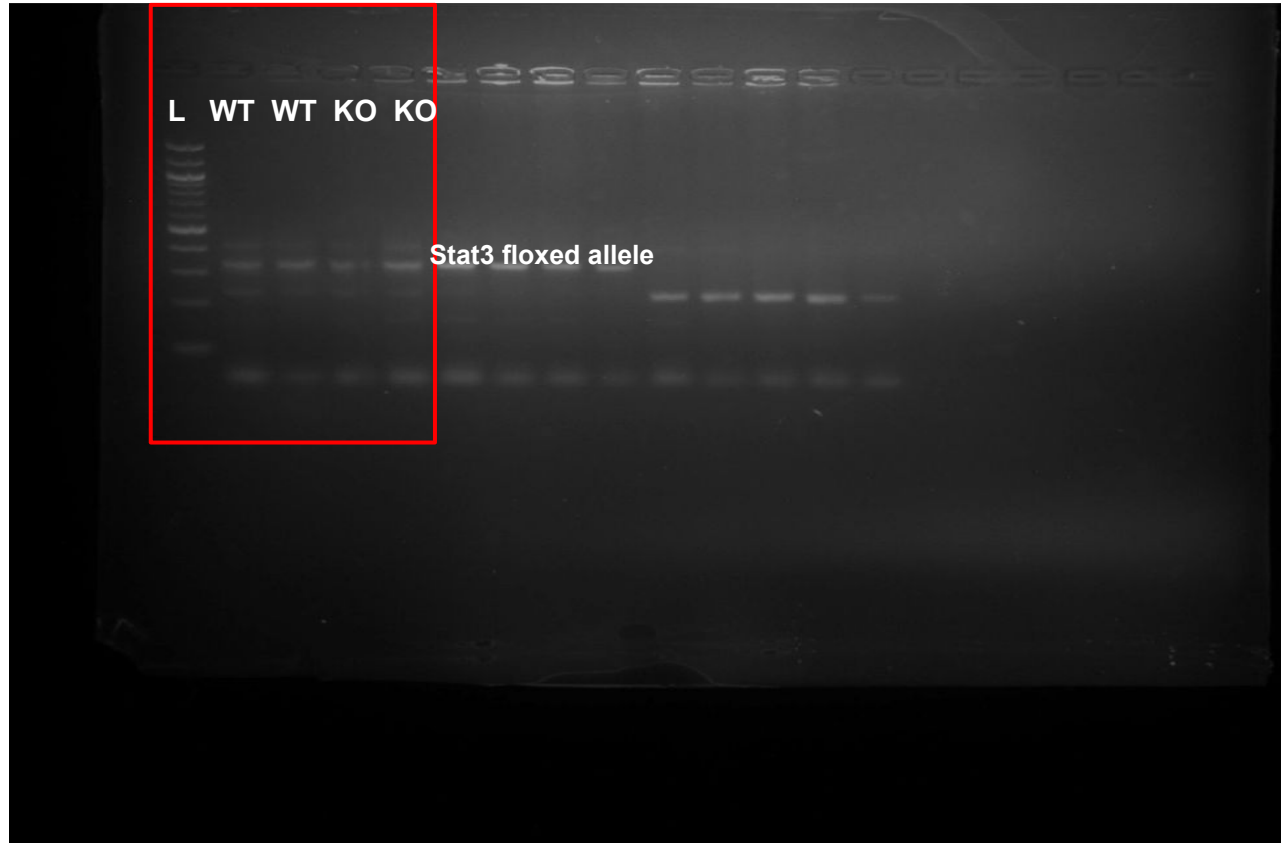

## Gel run for PCR product of fRelA

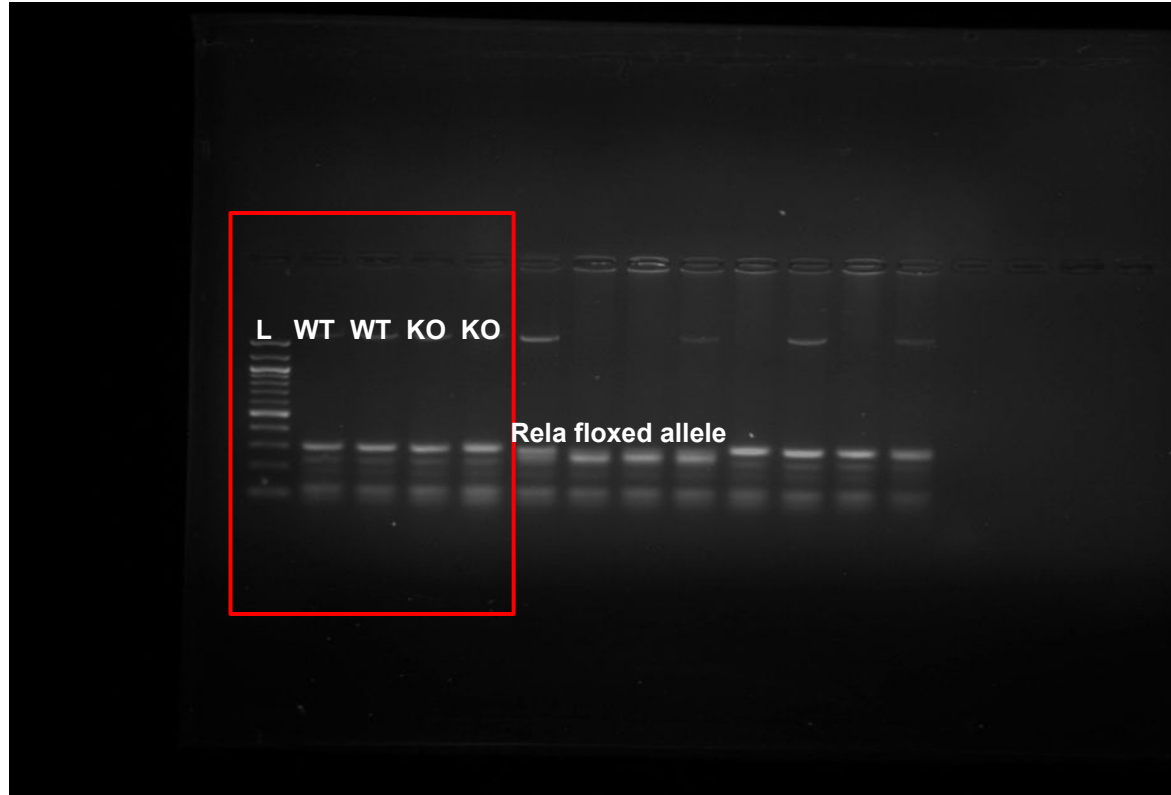

Supplement: fig2-figsupp1-data1 [file elife-93273-fig2-figsupp1-data1-v1.pdf]
