# Supplementary material for: A hepatocyte-specific transcriptional program driven by Rela and Stat3 exacerbates experimental colitis in mice by modulating bile synthesis
Source: eLife journal article supplement (doi:10.7554/elife.93273), 2023-12-08
Supplement: fig2-figsupp1-data3 [file elife-93273-fig2-figsupp1-data3-v1.pdf]

## Total RelA

M W1 W2 K1 K2 W1 W2 K1 K2

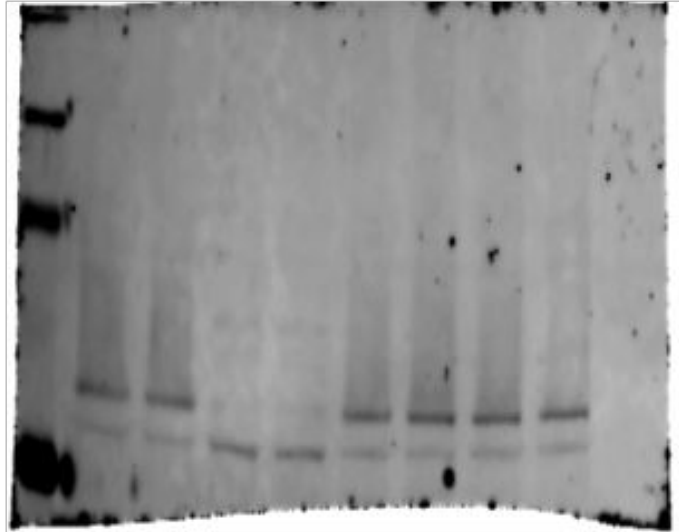

Red – liver  
Blue – colon  
W – wild type  
K – knockout

## Total Stat3

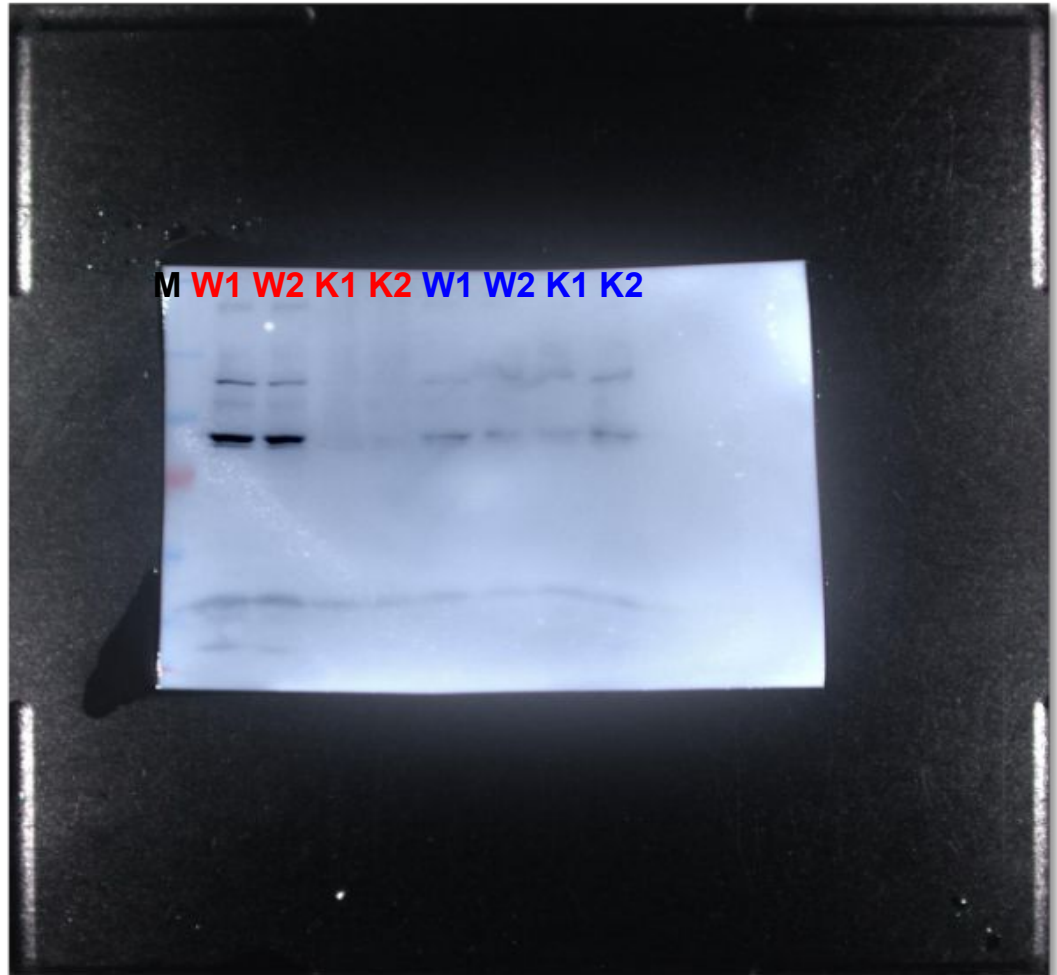

Red – liver  
Blue – colon  
W – wild type  
K – knockout

# Gapdh

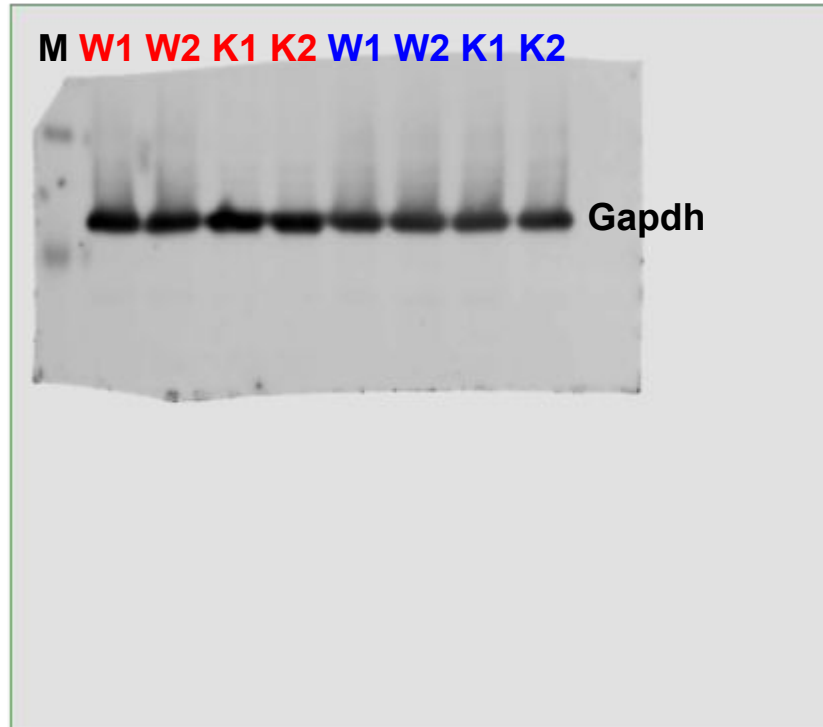

Red – liver  
Blue – colon  
W – wild type  
K – knockout
